# Supplementary material
Source: Springer Nature journal article supplement (https://www.springermedizin.de/resource/supplementary/12990_2011_392_MOESM3_ESM.pdf/9613168)

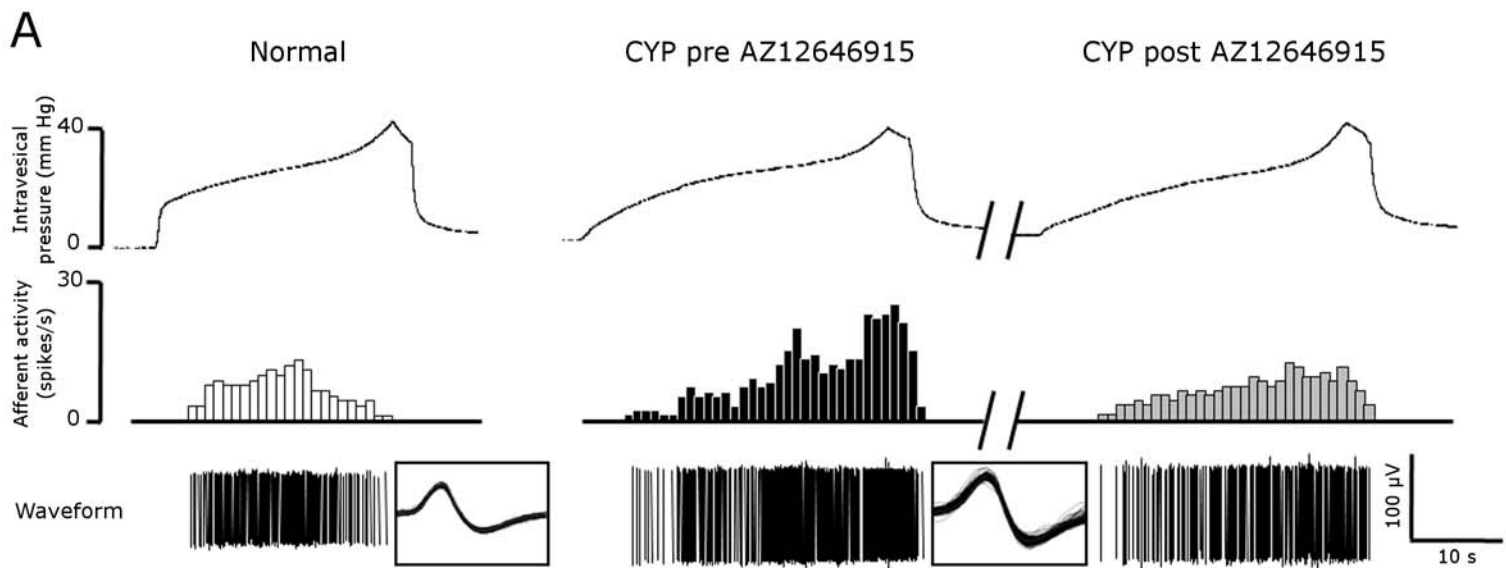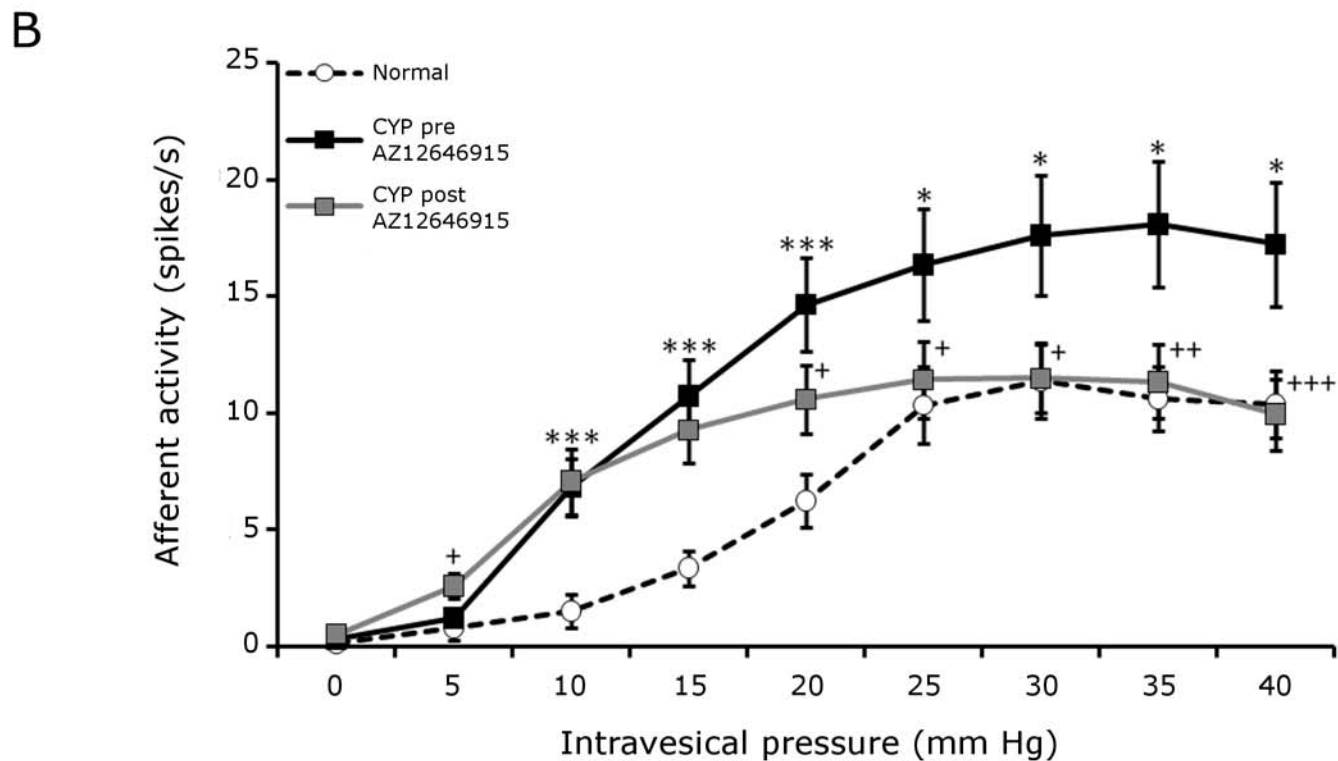

Supplement: MOESM3 [file 9613168]
